# Supplementary material for: Tumor Suppressive Role of miR-342-5p and miR-491-5p in Human Osteosarcoma Cells
Source: MDPI journal article supplement (doi:10.3390/ph15030362), 2022-03-16
Supplement: s1 [file s1]

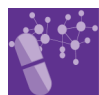

Article

# Tumor Suppressive Role of miR-342-5p and miR-491-5p in Human Osteosarcoma Cells

Clément Veys <sup>1</sup>, Manon Jammes <sup>1</sup>, Françoise Rédini <sup>2</sup>, Laurent Poulain <sup>3,4</sup>, Christophe Denoyelle <sup>3,4,5</sup>, Florence Legendre <sup>1,†</sup> and Philippe Galera <sup>1,\*</sup>

<sup>1</sup> Normandie Univ., UNICAEN, BIOTARGEN, 14000 Caen, France; clement.veys@gmail.com (C.V.); manon.jammes@unicaen.fr (M.J.); florence.legendre@unicaen.fr (F.L.)

<sup>2</sup> UMR 1238 Phy-Os “Bone Sarcomas and Remodeling of Calcified Tissues”, INSERM, Nantes University, F-44035 Nantes, France; francoise.redini@univ-nantes.fr (F.R.)

<sup>3</sup> Normandie Univ., UNICAEN, INSERM U1086 ANTICIPE, Biology and Innovative Therapeutics for Ovarian Cancer (BioTICLA), 14000 Caen, France; l.poulain@baclesse.unicancer.fr (L.P.); c.denoyelle@baclesse.unicancer.fr (C.D.)

<sup>4</sup> UNICANCER, Comprehensive Cancer Center F. Baclesse, 14000 Caen, France

<sup>5</sup> Normandie Univ., UNICAEN, Federative Structure Normandie Oncology, US Platon, ImpedanCELL Platform, 14000 Caen, France

\* Correspondence: philippe.galera@unicaen.fr

† These authors contribute equally to the work.

## miRNAs without CDDP

(A)

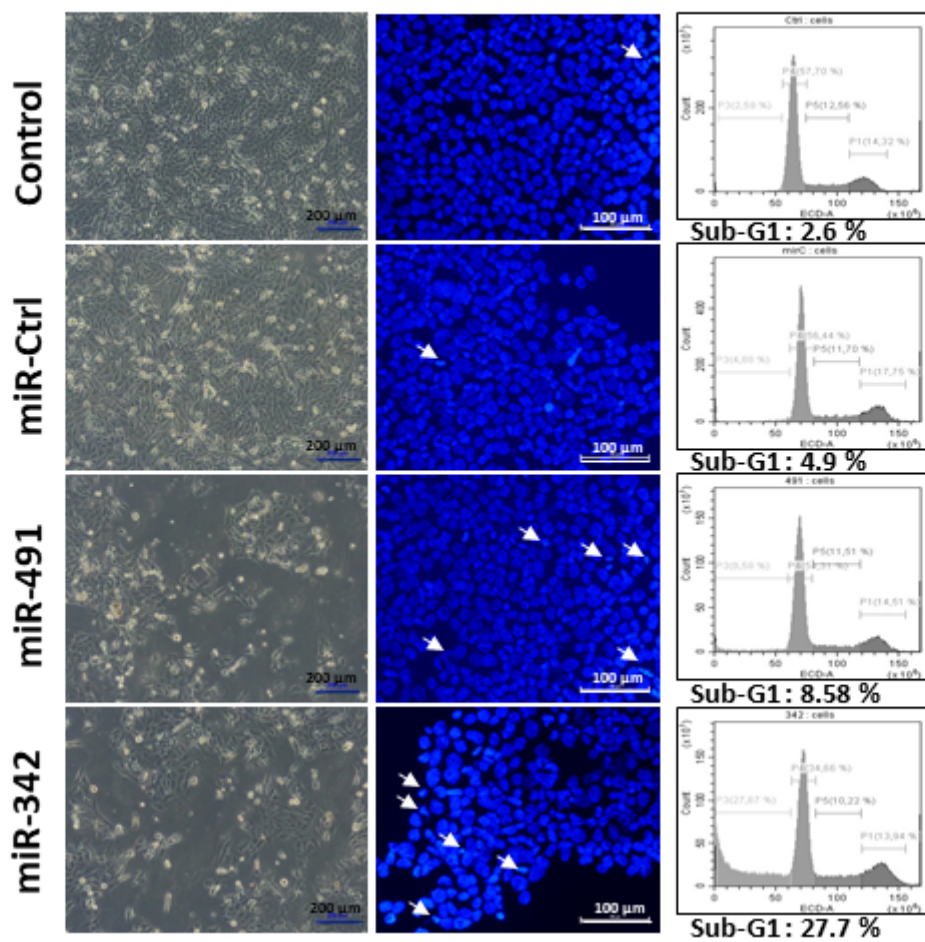

## miRNAs with CDDP

(B)

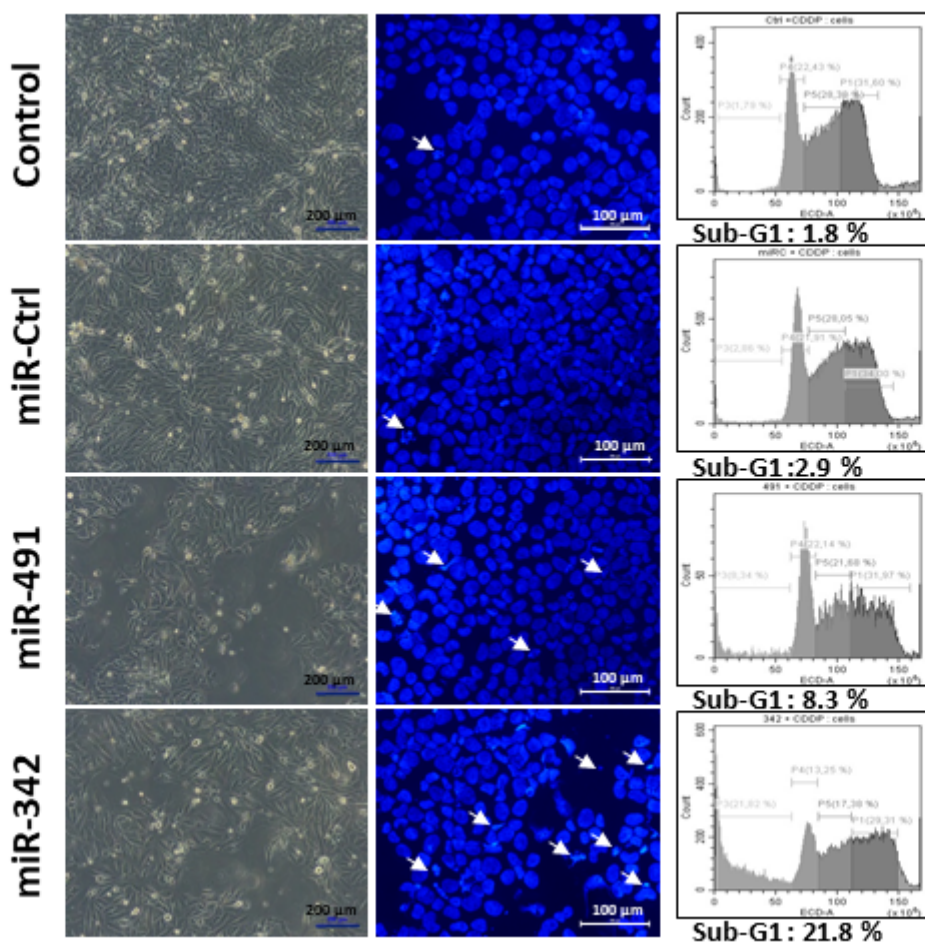

**Figure S1. Characterization of the effects of miR-491-5p and miR-342-5p on HOS cells.**

HOS cells were transfected with miRNAs 24 h after seeding as described in Figure 3. Treatment with cisplatin (CDDP) (0.5 µg/ml) was performed 48 h post-transfection for 24 h. Analyses were carried out 72 h post-transfection. In the left part of each panel, cell morphology was obtained with photonic microscopy at the end of the experiment. In the middle part of each panel, nuclear morphology was obtained after DAPI staining. White arrowheads show cells with condensed and/or fragmented chromatin and cellular debris. In the right part of each panel, DNA content histograms were obtained using flow cytometry. Images shown are representative of five independent experiments.

## miRNAs without CDDP

(A)

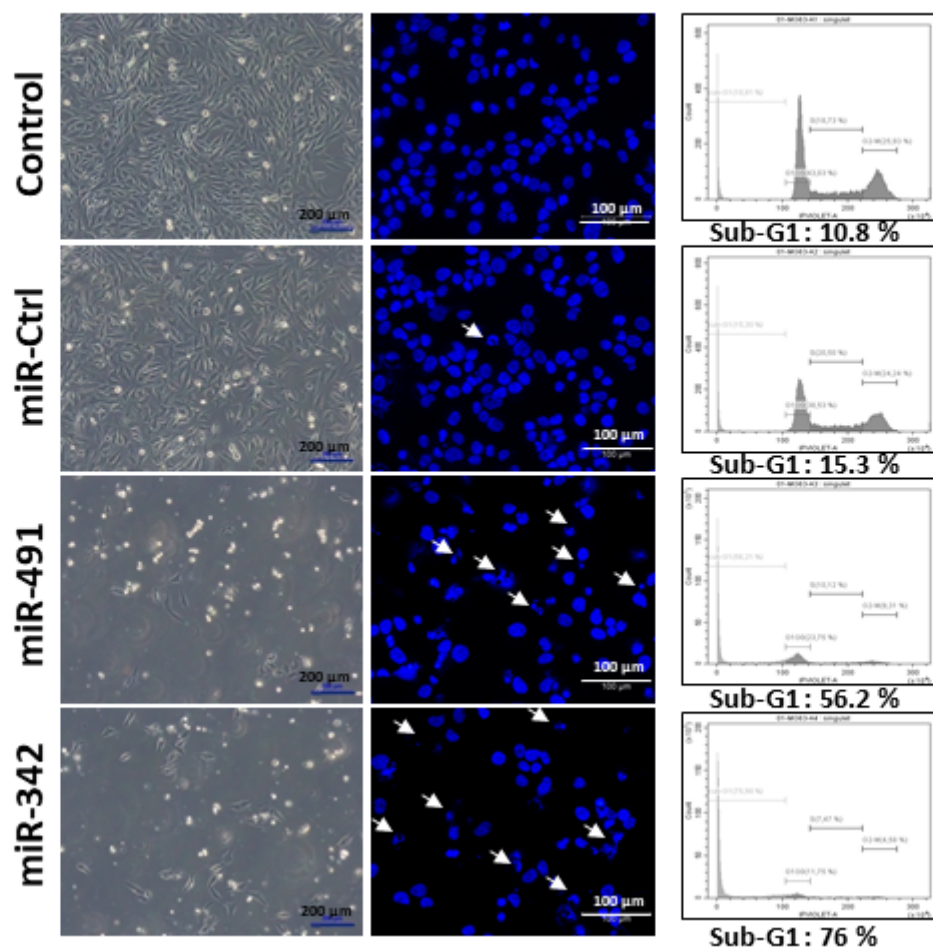

## miRNAs with CDDP

(B)

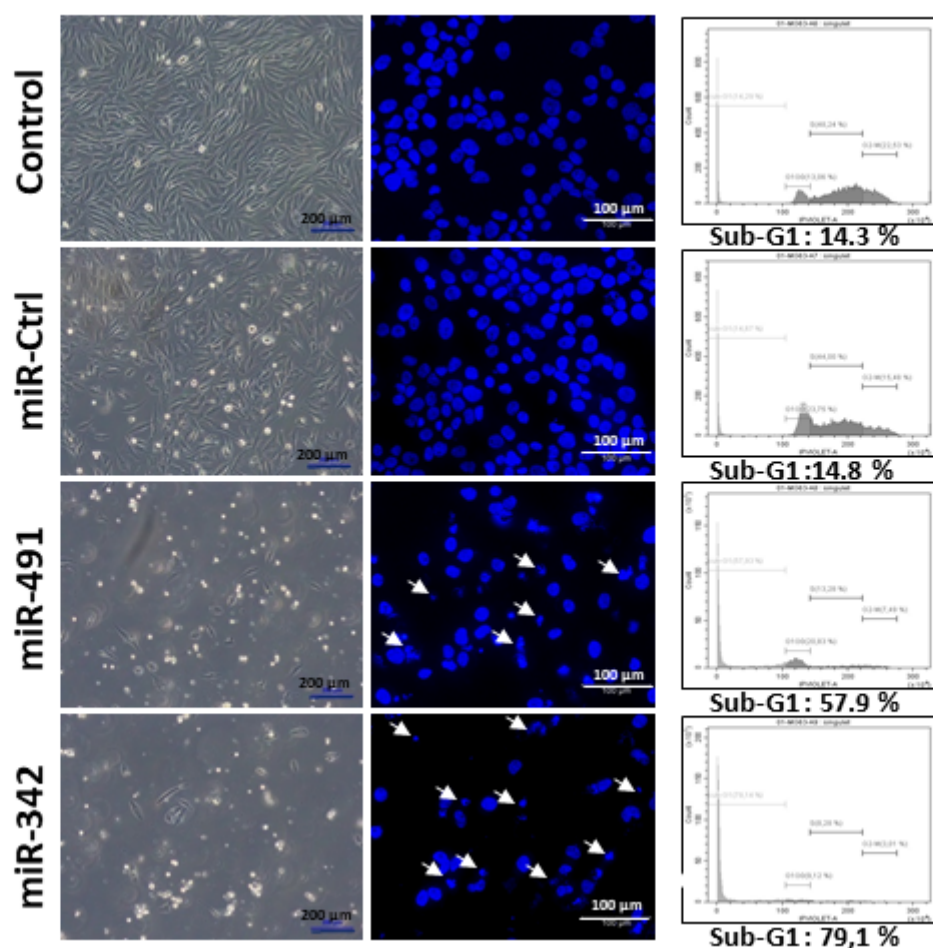

**Figure S2. Characterization of the effects of miR-491-5p and miR-342-5p on MG-63 cells.** MG-63 cells were transfected with miRNAs 24 h after seeding as described in Figure 3. Treatment with cisplatin (CDDP) (0.5  $\mu$ g/ml) was performed 48 h post-transfection for 24 h. Analyses were carried out 72 h post-transfection. In the left part of each panel, cell morphology was obtained with photonic microscopy at the end of the experiment. In the middle part of each panel, nuclear morphology was obtained after DAPI staining. White arrowheads show cells with condensed and/or fragmented chromatin and cellular debris. In the right part of each panel, DNA content histograms were obtained using flow cytometry. Images shown are representative of four independent experiments.



## miRNAs without CDDP

(A)

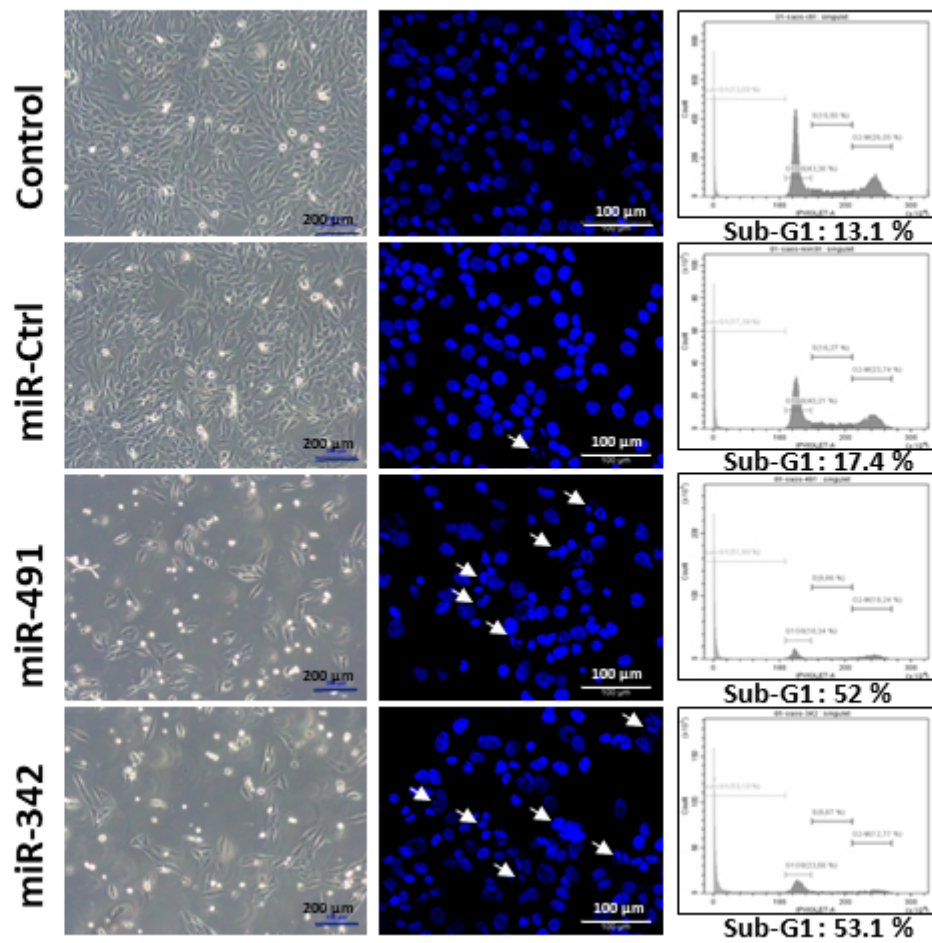

## miRNAs with CDDP

(B)

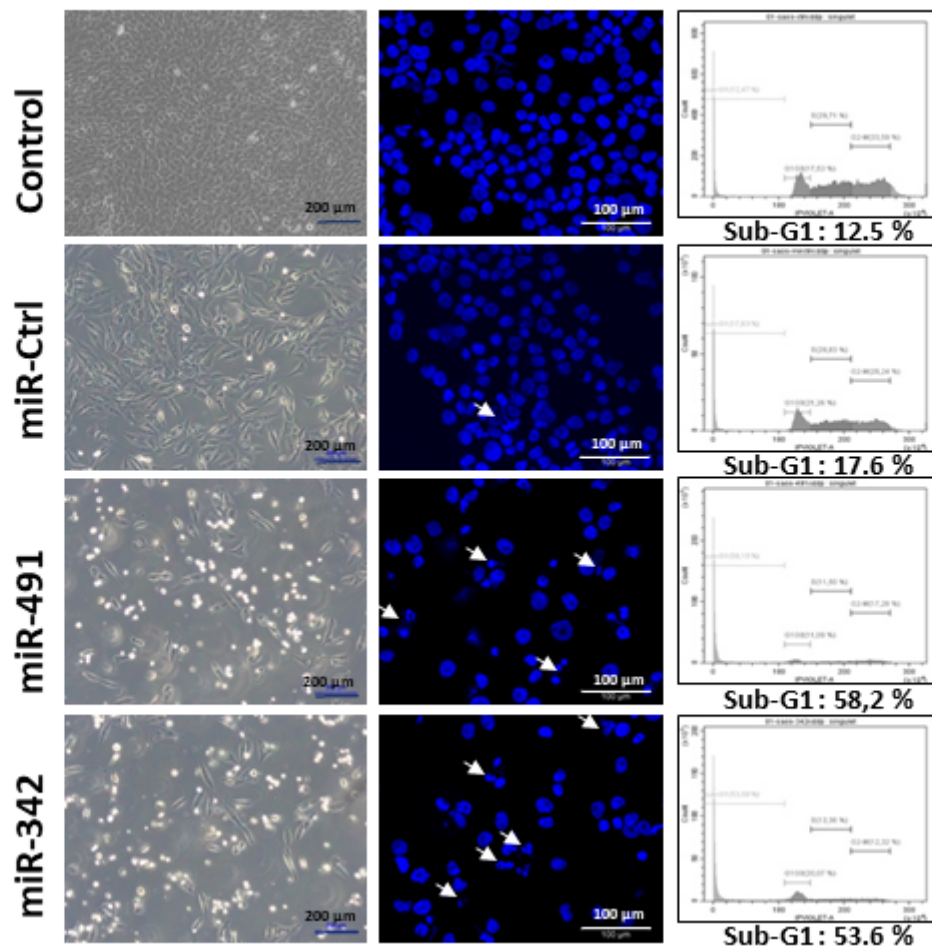

**Figure S3. Characterization of the effects of miR-491-5p and miR-342-5p on SaOS-2 cells.** SaOS-2 cells were transfected with miRNAs 24 h after seeding as described in Figure 3. Treatment with cisplatin (CDDP) (0.5 µg/ml) was performed 48 h post-transfection for 24 h. Analyses were carried out 72 h post-transfection. In the left part of each panel, cell morphology was obtained with photonic microscopy at the end of the experiment. In the middle part of each panel, nuclear morphology was obtained after DAPI staining. White arrowheads show cells with condensed and/or fragmented chromatin and cellular debris. In the right part of each panel, DNA content histograms were obtained using flow cytometry. Images shown are representative of four independent experiments.

**HOS**

**MG-63**

**SaOS-2**

**Ctrl**

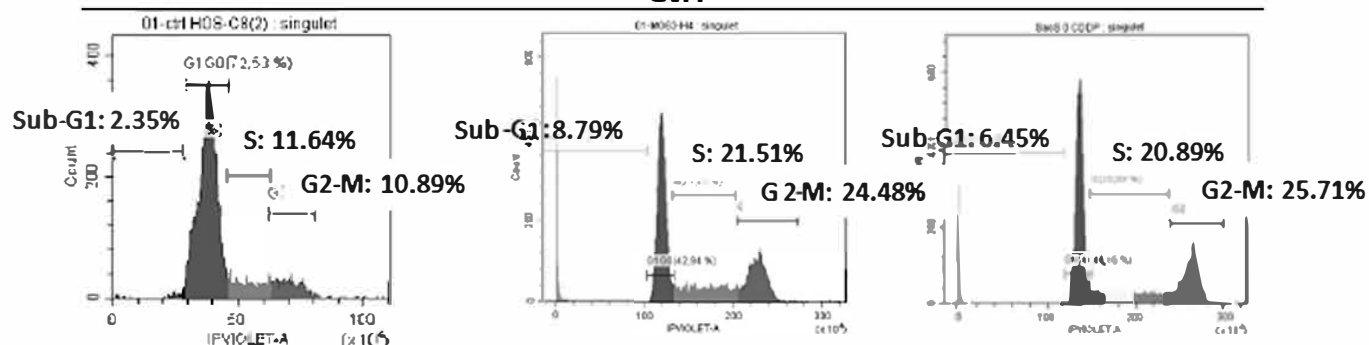

**0.5 µg/mL or 1.65 µM CDDP**

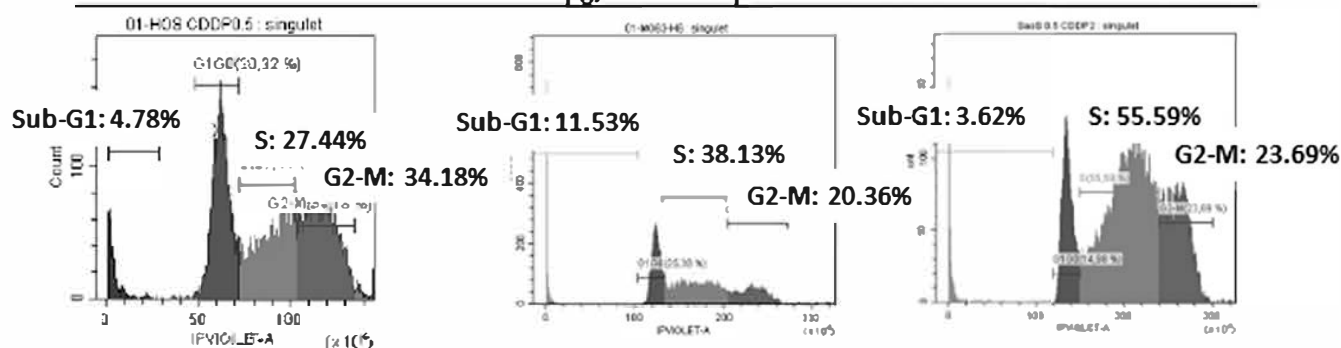

**10 µg/mL or 33 µM CDDP**

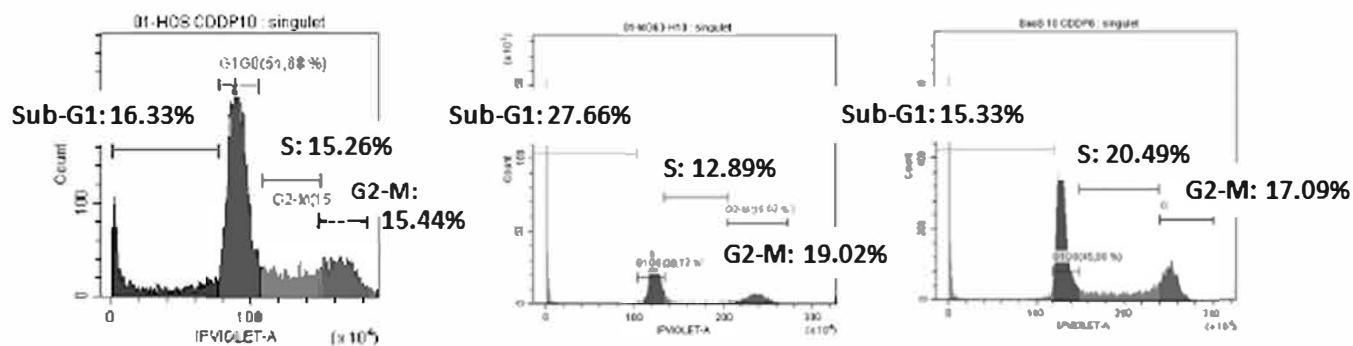

**40 µg/mL or 132 µM CDDP**

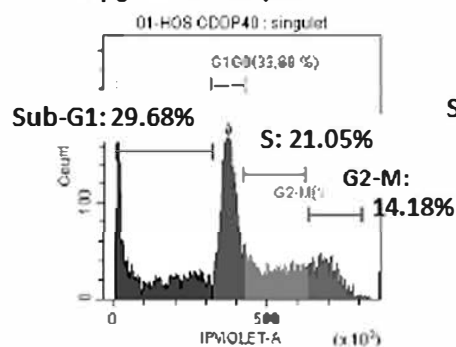

**20 µg/mL or 66 µM CDDP**

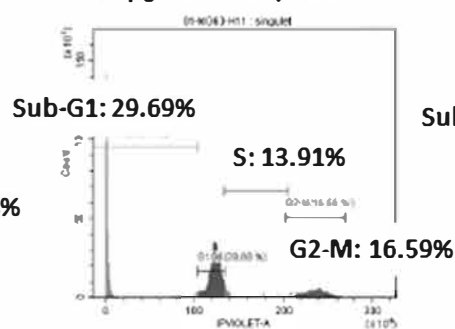

**50 µg/mL or 165 µM CDDP**

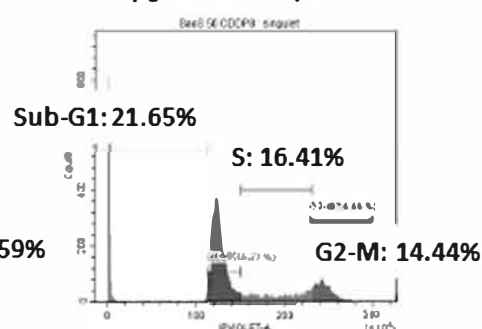



**Figure S4. CDDP dose-response in osteosarcoma cell lines.**

HOS, MG-63 and SaoS-2 cells were treated 72 h after seeding with cisplatin (CDDP) for 24 h at the indicated concentrations (0.5, 10, or 20, or 40 or 50  $\mu\text{g/mL}$ ). DNA content histograms were obtained using flow cytometry. Images shown are representative of two independent experiments.
